# Supplementary material
Source: PubMed Central journal article supplement (PMC10178917)
Supplement: hcq-16-e009652-s001.pdf [file hcq-16-e009652-s001.pdf]

STROBE Statement—checklist of items that should be included in reports of observational studies → *Please note that all line numbers refer to the PDF version of the “changes accepted” document*

|                           | Item No. | Recommendation                                                                                                                                                                       | Page No.                                          | Relevant text from manuscript |
|---------------------------|----------|--------------------------------------------------------------------------------------------------------------------------------------------------------------------------------------|---------------------------------------------------|-------------------------------|
| <b>Title and abstract</b> | 1        | (a) Indicate the study’s design with a commonly used term in the title or the abstract                                                                                               | Pages 1-2, lines 1-3, lines 55-56                 |                               |
|                           |          | (b) Provide in the abstract an informative and balanced summary of what was done and what was found                                                                                  | Page 2, lines 48-76                               |                               |
| <b>Introduction</b>       |          |                                                                                                                                                                                      |                                                   |                               |
| Background/rationale      | 2        | Explain the scientific background and rationale for the investigation being reported                                                                                                 | Page 3, lines 79-98                               |                               |
| Objectives                | 3        | State specific objectives, including any prespecified hypotheses                                                                                                                     | Pages 3-4, lines 100-109                          |                               |
| <b>Methods</b>            |          |                                                                                                                                                                                      |                                                   |                               |
| Study design              | 4        | Present key elements of study design early in the paper                                                                                                                              | Page 3, lines 103-105; Page 4, lines 112-136      |                               |
| Setting                   | 5        | Describe the setting, locations, and relevant dates, including periods of recruitment, exposure, follow-up, and data collection                                                      | Pages 3-4, lines 112-151                          |                               |
| Participants              | 6        | ( <i>Cross-sectional study</i> )—Give the eligibility criteria, and the sources and methods of selection of participants                                                             | Page 4, line 112-125                              |                               |
| Variables                 | 7        | Clearly define all outcomes, exposures, predictors, potential confounders, and effect modifiers. Give diagnostic criteria, if applicable                                             | Page 5, line 154-166                              |                               |
| Data sources/measurement  | 8*       | For each variable of interest, give sources of data and details of methods of assessment (measurement). Describe comparability of assessment methods if there is more than one group | Page 4, lines 112-125                             |                               |
| Bias                      | 9        | Describe any efforts to address potential sources of bias                                                                                                                            | Page 4, lines 115-118; Pages 11-12, lines 339-361 |                               |

---

Study size

10 Explain how the study size was arrived at

Page 4, lines

113-118

---

Continued on next page

|                        |     |                                                                                                                                                                                                                                                                                                           |                                                      |
|------------------------|-----|-----------------------------------------------------------------------------------------------------------------------------------------------------------------------------------------------------------------------------------------------------------------------------------------------------------|------------------------------------------------------|
| Quantitative variables | 11  | Explain how quantitative variables were handled in the analyses. If applicable, describe which groupings were chosen and why                                                                                                                                                                              | Page 4, 128-136; Page 6, lines 176-178               |
| Statistical methods    | 12  | (a) Describe all statistical methods, including those used to control for confounding                                                                                                                                                                                                                     | Pages 5-6, lines 168-193                             |
|                        |     | (b) Describe any methods used to examine subgroups and interactions                                                                                                                                                                                                                                       | Page 6, lines 169-173                                |
|                        |     | (c) Explain how missing data were addressed                                                                                                                                                                                                                                                               | Page 6, lines 184-186.                               |
|                        |     | (d) <i>Cohort study</i> —If applicable, explain how loss to follow-up was addressed<br><i>Case-control study</i> —If applicable, explain how matching of cases and controls was addressed<br><i>Cross-sectional study</i> —If applicable, describe analytical methods taking account of sampling strategy | N/a                                                  |
|                        |     | (e) Describe any sensitivity analyses                                                                                                                                                                                                                                                                     | Page 6, lines 186-189.                               |
| <b>Results</b>         |     |                                                                                                                                                                                                                                                                                                           |                                                      |
| Participants           | 13* | (a) Report numbers of individuals at each stage of study—eg numbers potentially eligible, examined for eligibility, confirmed eligible, included in the study, completing follow-up, and analysed                                                                                                         | Page 6, lines 196-199.<br>Pages 23-27,<br>Tables 1-3 |
|                        |     | (b) Give reasons for non-participation at each stage                                                                                                                                                                                                                                                      | N/a                                                  |
|                        |     | (c) Consider use of a flow diagram                                                                                                                                                                                                                                                                        | N/a                                                  |
| Descriptive data       | 14* | (a) Give characteristics of study participants (eg demographic, clinical, social) and information on exposures and potential confounders                                                                                                                                                                  | Pages 6-7, lines 196-208. Pages 23-27,<br>Tables 1-3 |
|                        |     | (b) Indicate number of participants with missing data for each variable of interest                                                                                                                                                                                                                       | Page 6, lines 184-185                                |

|              |     |                                                                                                                                                                                                              |                                                                |
|--------------|-----|--------------------------------------------------------------------------------------------------------------------------------------------------------------------------------------------------------------|----------------------------------------------------------------|
|              |     | (c) <i>Cohort study</i> —Summarise follow-up time (eg, average and total amount)                                                                                                                             | N/a                                                            |
| Outcome data | 15* | <i>Cohort study</i> —Report numbers of outcome events or summary measures over time                                                                                                                          | N/a                                                            |
|              |     | <i>Case-control study</i> —Report numbers in each exposure category, or summary measures of exposure                                                                                                         | N/a                                                            |
|              |     | <i>Cross-sectional study</i> —Report numbers of outcome events or summary measures                                                                                                                           | Pages 7-8,<br>lines 221-<br>250. Pages<br>23-27,<br>Tables 1-3 |
| Main results | 16  | (a) Give unadjusted estimates and, if applicable, confounder-adjusted estimates and their precision (eg, 95% confidence interval). Make clear which confounders were adjusted for and why they were included | Page 6, lines<br>175-191.<br>Pages 7-8,<br>221-50.             |
|              |     | (b) Report category boundaries when continuous variables were categorized                                                                                                                                    | N/a                                                            |
|              |     | (c) If relevant, consider translating estimates of relative risk into absolute risk for a meaningful time period                                                                                             | N/a                                                            |

Continued on next page

|                          |    |                                                                                                                                                                            |                                   |
|--------------------------|----|----------------------------------------------------------------------------------------------------------------------------------------------------------------------------|-----------------------------------|
| Other analyses           | 17 | Report other analyses done—eg analyses of subgroups and interactions, and sensitivity analyses                                                                             | Page 8-9,<br>lines 253-<br>263    |
| <b>Discussion</b>        |    |                                                                                                                                                                            |                                   |
| Key results              | 18 | Summarise key results with reference to study objectives                                                                                                                   | Page 9, lines<br>266-269          |
| Limitations              | 19 | Discuss limitations of the study, taking into account sources of potential bias or imprecision. Discuss both direction and magnitude of any potential bias                 | Pages 11-12,<br>lines 339-<br>361 |
| Interpretation           | 20 | Give a cautious overall interpretation of results considering objectives, limitations, multiplicity of analyses, results from similar studies, and other relevant evidence | Page 10,<br>lines 298-<br>307     |
| Generalisability         | 21 | Discuss the generalisability (external validity) of the study results                                                                                                      | Page 12,<br>lines 372-<br>373     |
| <b>Other information</b> |    |                                                                                                                                                                            |                                   |
| Funding                  | 22 | Give the source of funding and the role of the funders for the present study and, if applicable, for the original study on which the present article is based              | Page 12,<br>lines 376-<br>379     |

\*Give information separately for cases and controls in case-control studies and, if applicable, for exposed and unexposed groups in cohort and cross-sectional studies.

**Note:** An Explanation and Elaboration article discusses each checklist item and gives methodological background and published examples of transparent reporting. The STROBE checklist is best used in conjunction with this article (freely available on the Web sites of PLoS Medicine at <http://www.plosmedicine.org/>, Annals of Internal Medicine at <http://www.annals.org/>, and Epidemiology at <http://www.epidem.com/>). Information on the STROBE Initiative is available at [www.strobe-statement.org](http://www.strobe-statement.org).
